# Supplementary figures and images for: Back to the Salt Mines: Genome and Transcriptome Comparisons of the Halophilic Fungus Aspergillus salisburgensis and Its Halotolerant Relative Aspergillus sclerotialis
Source: MDPI journal article supplement (doi:10.3390/genes10050381), 2019-05-20

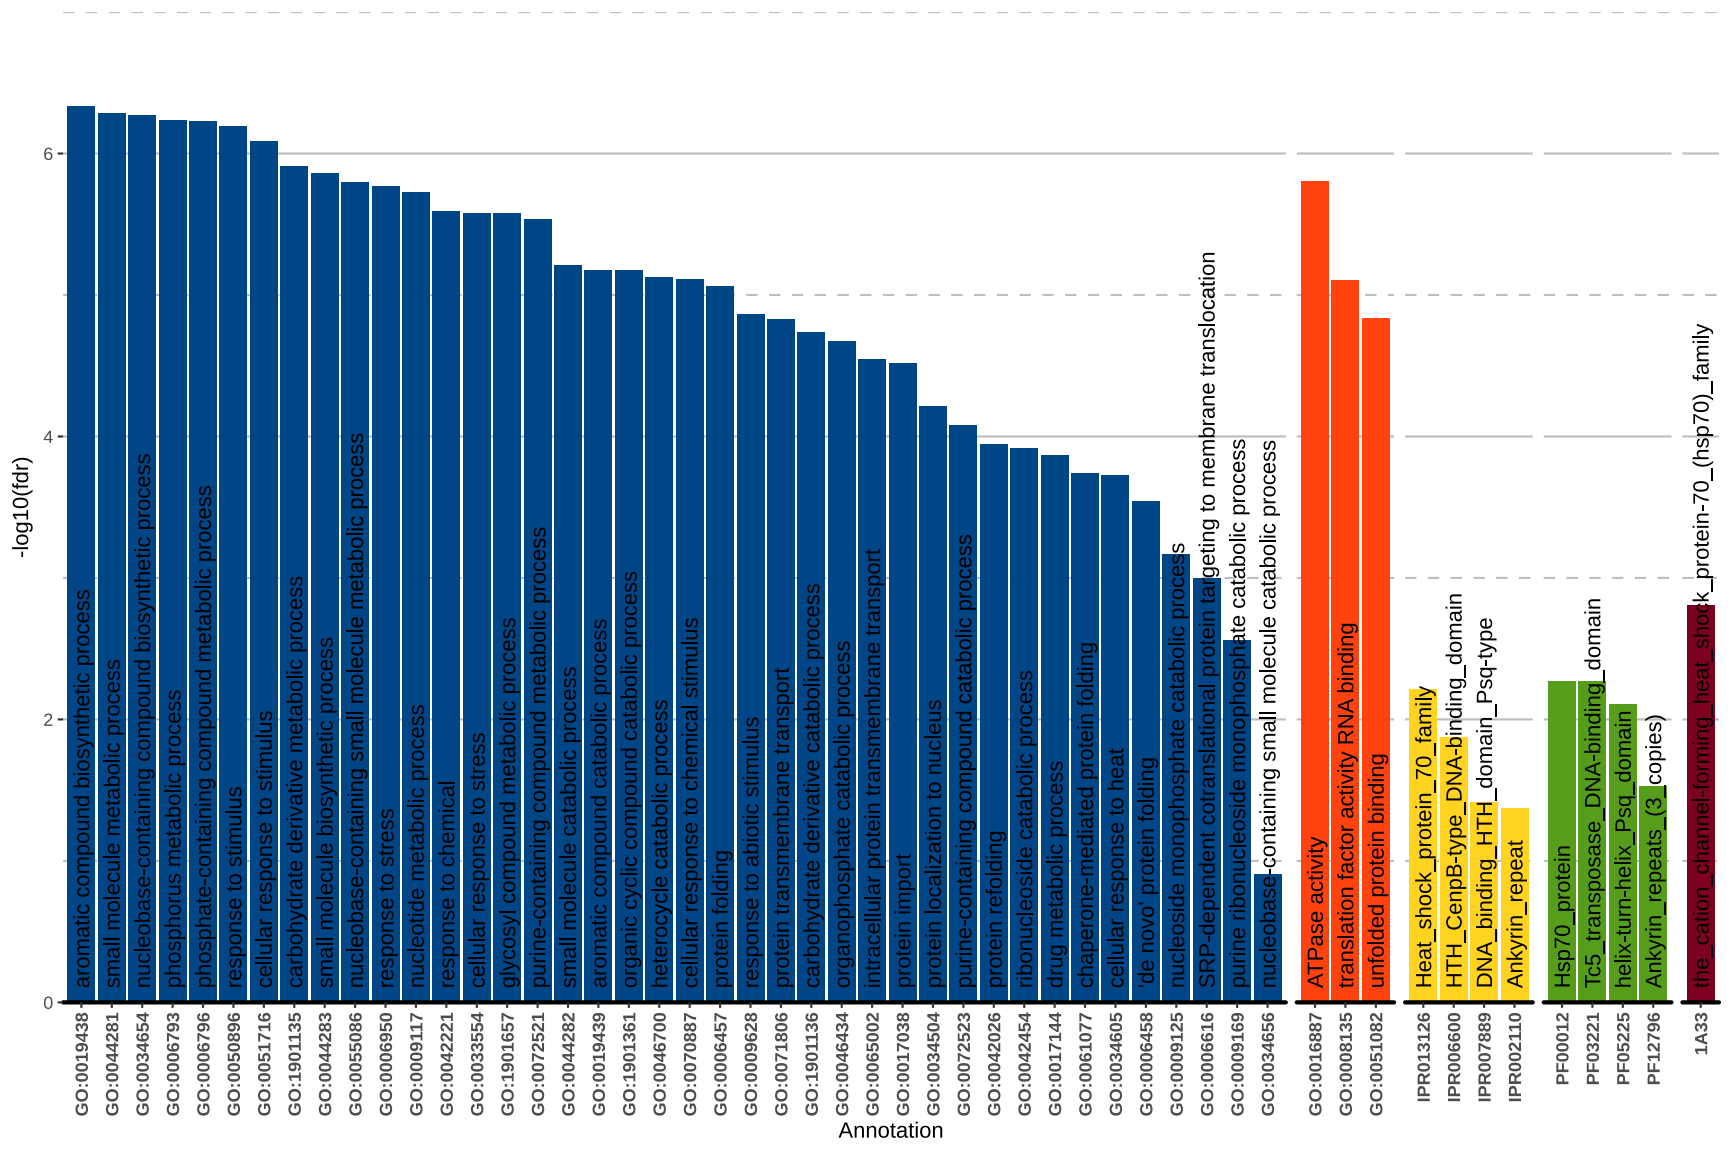

Supplement: s1 [file s1]
